# Supplementary material for: Declining Sea Ice and Its Relationship with Arctic Cyclones in Current and Future Climate Part I: Current Climatology in CMIP6 Models
Source: Copernicus journal article supplement (doi:10.5194/wcd-2023-2), 2023-02-14
Supplement: Supplementary file 1 [file Table_S1.xlsx]

## Sheet: Sheet1
				Cyclonecounts Cold season
	mean	perecentage difference to ERA5 [%]	median	std	MSE	95 CI	Means statistically significant different from ERA5 mean
ERA5	58.9667		59	8.73874	0	N/A
Multimodel	51.75	-0.122	52	8.5822	125.632	(43.176831514018474, 60.323168485981526)	yes
EC-Earth3	51.2333	-0.132	52	7.7618	167.267	N/A	yes
BCC-CSM2-MR	52.9667	-0.1017	52.5	8.01866	184	N/A	yes
MRI-ESM2-0	57.6667	-0.022	57	7.4087	159.567	N/A	no
MIROC6	45.5333	-0.2288	45.5	8.3296	256.5	N/A	yes
MPI-ESM1-2-HR	54.9333	-0.0695	55	5.75577	129.1	N/A	yes
MPI-ESM1-2-LR	48.1667	-0.1831	47.5	7.84892	239.6	N/A	yes
				Cyclonecounts Warm season
	mean	perecentage difference to ERA5 [%]	median	std	MSE	95 CI	Means statistically significant different from ERA5 mean
ERA5	70.4667		71	8.90593	0	N/A
Multimodel	52.8833	-0.2496	53	8.41578	415.514	(44.47641474029401, 61.290251926372655)	yes
EC-Earth3	54.0667	-0.2326	53.5	6.72772	417.733	N/A	yes
BCC-CSM2-MR	51.0667	-0.2752	51	7.25228	534.6	N/A	yes
MRI-ESM2-0	59.2333	-0.1601	60	8.28928	321.967	N/A	yes
MIROC6	48.7333	-0.3092	48.5	6.74257	590.867	N/A	yes
MPI-ESM1-2-HR	58	-0.1773	59	6.65332	269.4	N/A	yes
MPI-ESM1-2-LR	46.2	-0.526	45	5.96322	733.467	N/A	yes
					Cyclogenesis Cold season
	mean	perecentage difference to ERA5 [%]	median	std	MSE	95 CI	Means statistically significant different from ERA5 mean
ERA5	33.4333		34.5	5.55388	0	N/A
Multimodel	24.9556	-0.2537	25	5.14546	103.415	(19.815506487479215, 30.095604623631896)	yes
EC-Earth3	26.5333	-0.2064	27	5.41438	83.9667	N/A	yes
BCC-CSM2-MR	21.5667	-0.355	21	4.20859	203.133	N/A	yes
MRI-ESM2-0	27.6667	-0.1726	27	4.67856	95.2333	N/A	yes
MIROC6	24.4333	-0.2692	24.5	5.03775	120.467	N/A	yes
MPI-ESM1-2-HR	26.2	-0.2163	25.5	4.21426	93.8333	N/A	yes
MPI-ESM1-2-LR	23.3333	-0.3021	22	4.585	153.9	N/A	yes
					Cyclogenesis Warm season
	mean	perecentage difference to ERA5 [%]	median	std	MSE	95 CI	Means statistically significant different from ERA5 mean
ERA5	41.5		43	6.99405	0	N/A
Multimodel	24.9222	-0.3995	26	6.48027	334.385	(18.448768235834727, 31.395676208609714)	yes
EC-Earth3	26.7333	-0.3559	27	5.29108	305.5	N/A	yes
BCC-CSM2-MR	19.1667	-0.5383	19	4.6839	581.4	N/A	yes
MRI-ESM2-0	29.8	-0.2819	30	5.81034	226.967	N/A	yes
MIROC6	25.1	-0.3952	25.5	5.3563	342.867	N/A	yes
MPI-ESM1-2-HR	27.5667	-0.3359	27.5	4.82136	265.4	N/A	yes
MPI-ESM1-2-LR	21.1667	-0.4901	21.5	5.91655	510.467	N/A	yes
				ACEarea Cold season
	mean	perecentage difference to ERA5 [%]	median	std	MSE	95 CI	Means statistically significant different from ERA5 mean
ERA5	42.0188		41.9263	3.7403	0	N/A
Multimodel	35.1474	-0.158	37.3414	16.4663	60.7733	(18.69851793863601, 51.596377397231954)	yes
EC-Earth3	41.7535	-0.0048	41.6741	4.63775	28.2915	N/A	no
BCC-CSM2-MR	6.57573	-0.8429	6.56644	0.729812	1269.77	N/A	yes
MRI-ESM2-0	59.1248	0.4189	58.9995	7.23147	355.281	N/A	yes
MIROC6	27.4544	-0.3431	28.2081	2.51498	224.647	N/A	yes
MPI-ESM1-2-HR	40.1062	-0.0422	39.7946	3.98431	34.1543	N/A	yes
MPI-ESM1-2-LR	35.8701	-0.1396	35.9654	3.33193	57.0509	N/A	yes
				ACEarea Warm season
	mean	perecentage difference to ERA5 [%]	median	std	MSE	95 CI	Means statistically significant different from ERA5 mean
ERA5	42.3358		42.879	3.01188	0	N/A
Multimodel	33.7014	-0.199	34.5611	13.982	88.0337	(19.734168225497783, 47.6686520616601)	yes
EC-Earth3	39.6363	-0.0573	39.101	3.02268	30.8001	N/A	yes
BCC-CSM2-MR	10.9697	-0.7385	11.1055	2.407	1003.11	N/A	yes
MRI-ESM2-0	55.8312	0.3271	56.1217	4.47488	216.436	N/A	yes
MIROC6	26.0776	-0.3789	25.441	2.56581	284.698	N/A	yes
MPI-ESM1-2-HR	37.4307	-0.112	38.1324	2.65424	37.8197	N/A	yes
MPI-ESM1-2-LR	32.263	-0.2353	32.1896	2.93362	115.935	N/A	yes
				Radius Cold season
	mean	perecentage difference to ERA5 [%]	median	std	MSE	95 CI	Means statistically significant different from ERA5 mean
ERA5	9.25359		9.28779	0.612792	0	N/A
Multimodel	10.7657	0.1623	10.6099	1.04284	2.71337	(9.723908694653206, 11.807395672277812)	yes
EC-Earth3	10.2718	0.1075	10.249	0.713142	1.81797	N/A	yes
BCC-CSM2-MR	12.4119	0.3333	12.379	0.896584	11.3265	N/A	yes
MRI-ESM2-0	10.2557	0.1075	10.1937	0.682262	1.93852	N/A	yes
MIROC6	10.6766	0.1505	10.7583	0.724694	2.77426	N/A	yes
MPI-ESM1-2-HR	10.1898	0.0968	10.2079	0.434317	1.3217	N/A	yes
MPI-ESM1-2-LR	10.788	0.1613	10.8702	0.692205	3.19883	N/A	yes
				Radius Warm season
	mean	perecentage difference to ERA5 [%]	median	std	MSE	95 CI	Means statistically significant different from ERA5 mean
ERA5	9.7867		9.77816	0.444052	0	N/A
Multimodel	11.2278	0.1429	11.1795	0.81391	2.30056	(10.414747981204775, 12.040855161273614)	yes
EC-Earth3	10.9184	0.1122	10.7971	0.659068	1.98874	N/A	yes
BCC-CSM2-MR	12.2939	0.2551	12.1311	0.731583	6.87549	N/A	yes
MRI-ESM2-0	10.8253	0.102	10.7867	0.631166	1.88753	N/A	yes
MIROC6	11.0423	0.1224	11.1109	0.620373	2.04298	N/A	yes
MPI-ESM1-2-HR	10.8632	0.1122	10.9486	0.577623	1.62122	N/A	yes
MPI-ESM1-2-LR	11.4237	0.1633	11.3911	0.536928	3.02151	N/A	yes
				Central pressure Cold season
	mean	perecentage difference to ERA5 [%]	median	std	MSE	95 CI	Means statistically significant different from ERA5 mean
ERA5	99721.3		99765.8	311.188	0	N/A
Multimodel	99422.1	-0.003	99475.5	544.511	191923	(98878.11766437469, 99965.9939138998)	yes
EC-Earth3	99372.8	-0.0034	99291.3	291.812	267172	N/A	yes
BCC-CSM2-MR	98596.3	-0.0112	98581.9	379.662	1.5702e+06	N/A	yes
MRI-ESM2-0	99213.6	-0.0051	99246.5	371.634	483121	N/A	yes
MIROC6	99881.5	0.0016	99871.5	315.982	185787	N/A	yes
MPI-ESM1-2-HR	99658.5	-0.0006	99660.2	298.166	159787	N/A	no
MPI-ESM1-2-LR	99809.7	0.00089	99815.8	278.876	178866	N/A	no
				Central pressure Warm season
	mean	perecentage difference to ERA5 [%]	median	std	MSE	95 CI	Means statistically significant different from ERA5 mean
ERA5	99473.9		99485.6	180.312	0	N/A
Multimodel	99384.5	-0.0009	99403.9	364.81	44238.2	(99020.04719718259, 99748.89972343938)	yes
EC-Earth3	99323.2	-0.0015	99287.6	155.274	86473.5	N/A	yes
BCC-CSM2-MR	98871	-0.006	98876.2	280.576	460804	N/A	yes
MRI-ESM2-0	99248.1	-0.0022	99272.9	231.983	165034	N/A	yes
MIROC6	99826	0.0035	99821.9	184.706	191527	N/A	yes
MPI-ESM1-2-HR	99438.1	-0.0004	99445.5	183.893	41737.9	N/A	no
MPI-ESM1-2-LR	99600.4	0.0013	99623	208.569	85389.4	N/A	yes
				Depth Cold season
	mean	perecentage difference to ERA5 [%]	median	std	MSE	95 CI	Means statistically significant different from ERA5 mean
ERA5	791.432		787.6	86.1807	0	N/A
Multimodel	891.73	0.139	860.868	150.992	19709.1	(740.8968364935496, 1042.563719529655)	yes
EC-Earth3	911.558	0.1639	927.916	125.955	37014	N/A	yes
BCC-CSM2-MR	1079.25	0.3753	1084.19	151.274	115975	N/A	yes
MRI-ESM2-0	923.779	0.1851	900.481	128.036	45415.1	N/A	yes
MIROC6	752.219	-0.0426	764.894	83.4189	11865.3	N/A	yes
MPI-ESM1-2-HR	863.57	0.0994	866.623	73.773	16169.5	N/A	yes
MPI-ESM1-2-LR	820.006	0.0512	836.633	85.2345	14999.7	N/A	no
				Depth Warm season
	mean	perecentage difference to ERA5 [%]	median	std	MSE	95 CI	Means statistically significant different from ERA5 mean
ERA5	823.51		833.997	66.9475	0	N/A
Multimodel	825.996	0.011	826.067	102.444	5875.96	(723.6597850226924, 928.3326331525836)	no
EC-Earth3	869.208	0.0656	885.809	75.5819	16150.4	N/A	yes
BCC-CSM2-MR	888.549	0.0841	871.46	86.7233	13623.5	N/A	yes
MRI-ESM2-0	897.442	0.1007	912.386	92.3466	22202.3	N/A	yes
MIROC6	714.857	-0.1248	706.665	70.3422	22453.9	N/A	yes
MPI-ESM1-2-HR	816.836	-0.0081	837.261	71.9288	8045.71	N/A	no
MPI-ESM1-2-LR	769.085	-0.0611	758.756	67.2787	10595	N/A	yes
				DpDr cold season
	mean	perecentage difference to ERA5 [%]	median	std	MSE	95 CI	Means statistically significant different from ERA5 mean
ERA5	80.8645		80.7371	4.60997	0	N/A
Multimodel	76.1956	-0.063	76.5415	8.04512	43.537	(68.15890501220429, 84.2322123886934)	yes
EC-Earth3	82.0329	0.0136	81.7609	5.88659	51.0186	N/A	no
BCC-CSM2-MR	78.5262	-0.0276	79.1431	5.88796	60.9351	N/A	yes
MRI-ESM2-0	82.7045	0.0222	82.3558	6.12714	62.1267	N/A	no
MIROC6	65.6677	-0.1864	66.1478	3.29006	254.037	N/A	yes
MPI-ESM1-2-HR	78.3665	-0.0325	77.2646	4.53133	44.6603	N/A	yes
MPI-ESM1-2-LR	69.8756	-0.1336	69.8261	3.57214	147.876	N/A	yes
				DpDr Warm season
	mean	perecentage difference to ERA5 [%]	median	std	MSE	95 CI	Means statistically significant different from ERA5 mean
ERA5	80.7438		81.2841	4.38439	0	N/A
Multimodel	69.3521	-0.138	68.8817	6.88301	152.898	(62.47637275799529, 76.22790877569194)	yes
EC-Earth3	75.5149	-0.0609	74.7911	3.53076	69.7347	N/A	yes
BCC-CSM2-MR	67.004	-0.1681	67.0152	3.15599	213.952	N/A	yes
MRI-ESM2-0	78.0119	-0.0311	78.6879	3.95762	42.2977	N/A	yes
MIROC6	62.0522	-0.2305	61.8255	3.15107	391.1	N/A	yes
MPI-ESM1-2-HR	70.6545	-0.1223	71.4765	3.14576	131.601	N/A	yes
MPI-ESM1-2-LR	62.8754	-0.2198	62.5886	3.30505	343.134	N/A	yes
				SICarea Cold season
	mean	perecentage difference to ERA5 [%]	median	std	MSE	95 CI	Means statistically significant different from ERA5 mean
ERA5	0.93315		0.936256	0.0135592	0	N/A
Multimodel	0.919795	-0.0108	0.916122	0.0310777	0.00039596	(0.8887496323803477, 0.9508396806522634)	yes
EC-Earth3	0.931806	0	0.93883	0.015478	0.00047571	N/A	no
BCC-CSM2-MR	0.926488	0	0.925202	0.00759732	0.00035087	N/A	yes
MRI-ESM2-0	0.972523	0.043	0.974645	0.0103762	0.00180046	N/A	yes
MIROC6	0.90516	-0.0215	0.902803	0.0110754	0.00101744	N/A	yes
MPI-ESM1-2-HR	0.901578	-0.0323	0.901427	0.00954547	0.00124265	N/A	yes
MPI-ESM1-2-LR	0.881213	-0.0538	0.878324	0.0131262	0.00308923	N/A	yes
				SICarea Warm season
	mean	perecentage difference to ERA5 [%]	median	std	MSE	95 CI	Means statistically significant different from ERA5 mean
ERA5	0.729619		0.728458	0.0756746	0	N/A
Multimodel	0.682406	-0.0685	0.693858	0.0867571	0.00505354	(0.5957404567833777, 0.7690721391322328)	yes
EC-Earth3	0.752771	0.0274	0.772075	0.0655256	0.00533931	N/A	no
BCC-CSM2-MR	0.727975	0	0.733472	0.0591269	0.00440136	N/A	no
MRI-ESM2-0	0.674101	-0.0822	0.701843	0.0892441	0.00700639	N/A	yes
MIROC6	0.727185	0	0.73845	0.0404715	0.00475154	N/A	no
MPI-ESM1-2-HR	0.591099	-0.1918	0.601062	0.0673269	0.0244263	N/A	yes
MPI-ESM1-2-LR	0.621307	-0.1501	0.628585	0.0454294	0.0164339	N/A	yes
					Lifetime Cold season
	mean	perecentage difference to ERA5 [%]	median	std	MSE	95 CI	Means statistically significant different from ERA5 mean
ERA5	51.9811		42	4.8171	0	N/A	-
Multimodel	54.0401	0.0396	43	4.80776	32.0258	(49.23735798852105, 58.84276838259202)	yes
EC-Earth3	53.5581	0.0304	42	4.07859	43.6387	N/A	no
BCC-CSM2-MR	58.3706	0.1095	48	4.00927	79.7544	N/A	yes
MRI-ESM2-0	55.0114	0.0583	42	3.83808	57.7524	N/A	yes
MIROC6	51.8143	-0.0033	42	5.97993	54.7255	N/A	no
MPI-ESM1-2-HR	51.7229	-0.005	42	3.80685	36.3563	N/A	no
MPI-ESM1-2-LR	53.7632	0.0342	42	3.26598	38.3256	N/A	no
					Lifetime Warm season
	mean	perecentage difference to ERA5 [%]	median	std	MSE	95 CI	Means statistically significant different from ERA5 mean
ERA5	61.3083		42	3.85803	0	N/A	-
Multimodel	61.8725	0.0091	49	5.41079	17.1675	(56.467415201538955, 67.27761562558229)	no
EC-Earth3	62.4341	0.0183	48	5.02076	48.4428	N/A	no
BCC-CSM2-MR	60.4322	-0.0144	48	5.50932	36.1019	N/A	no
MRI-ESM2-0	65.607	0.0701	48	4.17076	48.4989	N/A	yes
MIROC6	59.8218	-0.0243	48	5.05574	41.0907	N/A	no
MPI-ESM1-2-HR	60.3357	-0.0158	48	4.49516	31.3764	N/A	no
MPI-ESM1-2-LR	62.6043	0.021	54	5.78775	51.6648	N/A	no
